# Supplementary material for: Optimization of in vivo antimalarial efficacy of combinations of aqueous leaf extracts of Artemisia annua L., Vernonia amygdalina Del, and Microglossa pyrifolia (Lam.) Kuntze using factorial design
Source: PubMed Central journal article supplement — BMC Complement Med Ther. 2024 Nov 13;24:393. doi: 10.1186/s12906-024-04691-z (PMC11562369; doi:10.1186/s12906-024-04691-z), 2024-11-13
Supplement: 12906_2024_4691_MOESM1_ESM.pdf [file 12906_2024_4691_MOESM1_ESM.pdf]

**MAKERERE**

P.O Box 7062 Kampala Uganda  
URL: <http://www.mak.ac.ug>

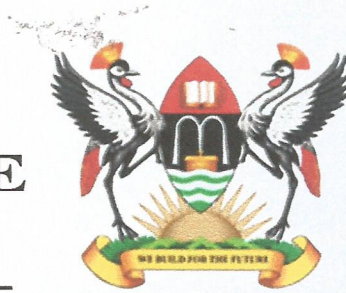

**UNIVERSITY**

Phone: +256 414 532401  
e-mail: [pmb@mak.ac.ug](mailto:pmb@mak.ac.ug)  
Fax: +256 414 531061

**COLLEGE OF NATURAL SCIENCES**

**DEPARTMENT OF PLANT SCIENCES, MICROBIOLOGY AND BIOTECHNOLOGY**

June 20, 2022

The Executive Secretary,  
Uganda National Council for Science and Technology (UNCST),  
P.O Box 6884,  
Kampala, Uganda.

Dear Sir/Madam,

**Re: Confirmation of Identifications of plant voucher specimens**

This is to acknowledge that, Mr. Angupale Jimmy Ronald of Mbarara University of Science and Technology (MUST) and the Principal Investigator (PI) for the Ph.D. research titled, "Design, Development, and Characterization of Drug Delivery Systems for Ugandan Antimalarial Plants - *Artemisia annua*, *Vernonia amygdalina* and *Microglossa pyrifolia*" submitted plant voucher specimens (AJR 01, AJR 02 and AJR 03) to our national herbarium. The voucher specimens' identifications were confirmed and accession numbers provided as follows:

| S/N | Specimen No. | Species ID                   | Plant Family | Accession No. |
|-----|--------------|------------------------------|--------------|---------------|
| 1   | AJR 01       | <i>Artemisia annua</i>       | Asteraceae   | 51147         |
| 2   | AJR 02       | <i>Vernonia amygdalina</i>   | Asteraceae   | 51146         |
| 3   | AJR 03       | <i>Microglossa pyrifolia</i> | Asteraceae   | 51145         |
|     |              |                              |              |               |

Any further assistance rendered to him in this regard will be appreciated.

Yours Sincerely,

.....  
Paul Ssegawa, PhD  
**CURATOR**  
**MAKERERE UNIVERSITY HERBARIUM**
